# Supplementary material
Source: PubMed Central journal article supplement (PMC3694766)
Supplement: NIHMS471660-supplement-supp_data.pdf [file NIHMS471660-supplement-supp_data.pdf]

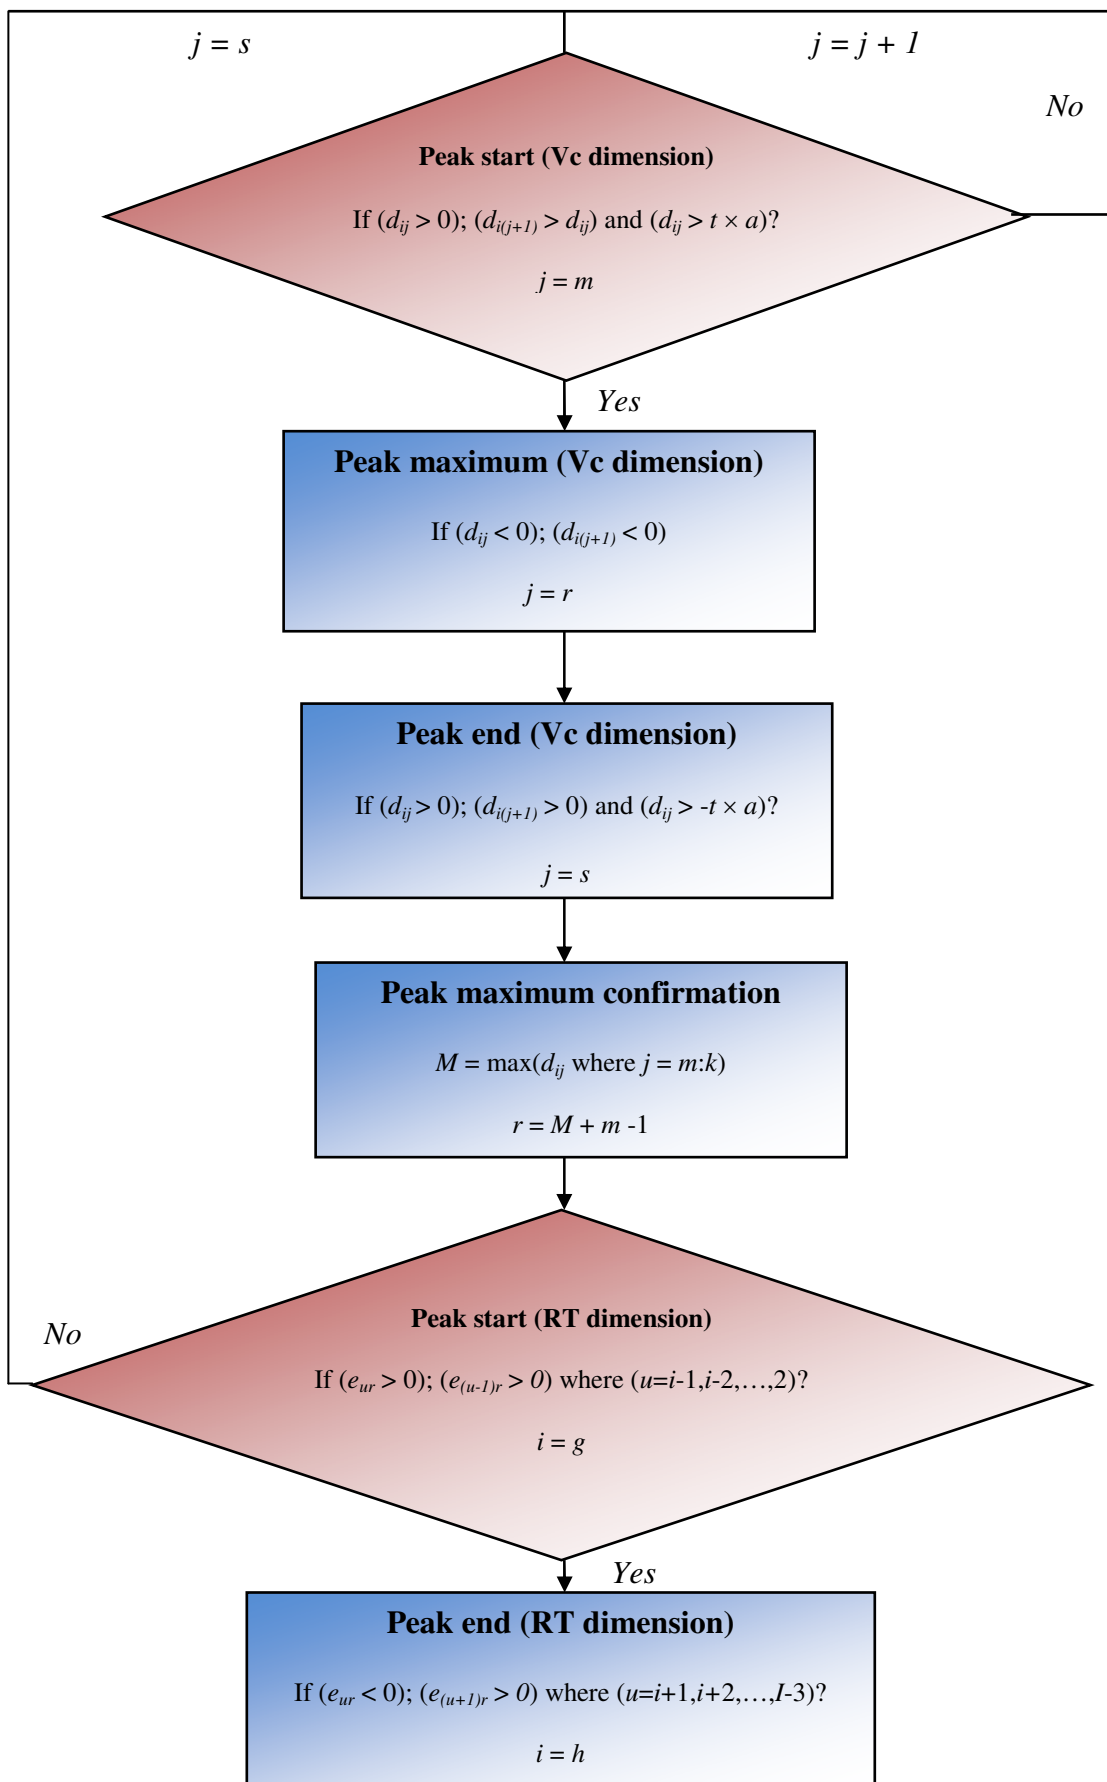

Figure S-1: General flow chart of peak detection algorithm for each voltogram with identification of the corresponding peak from the chromatographic dimension

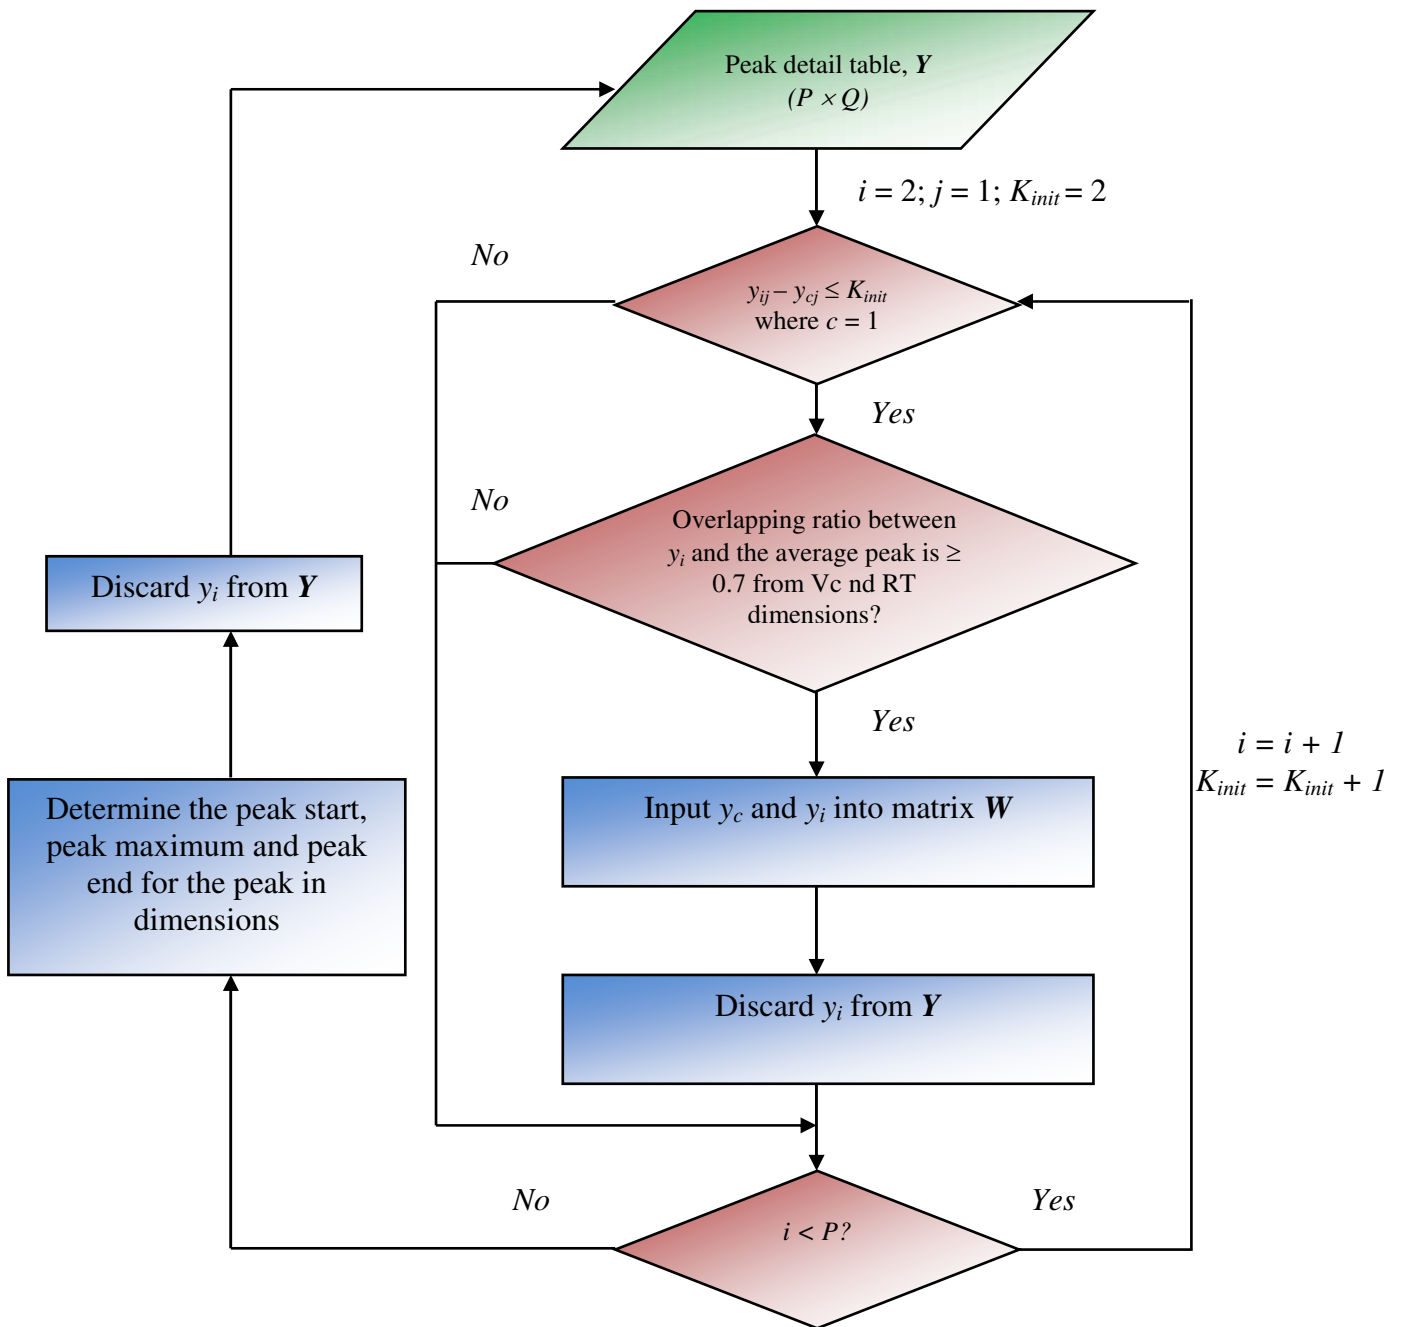

Figure S-2: Peak merging algorithm

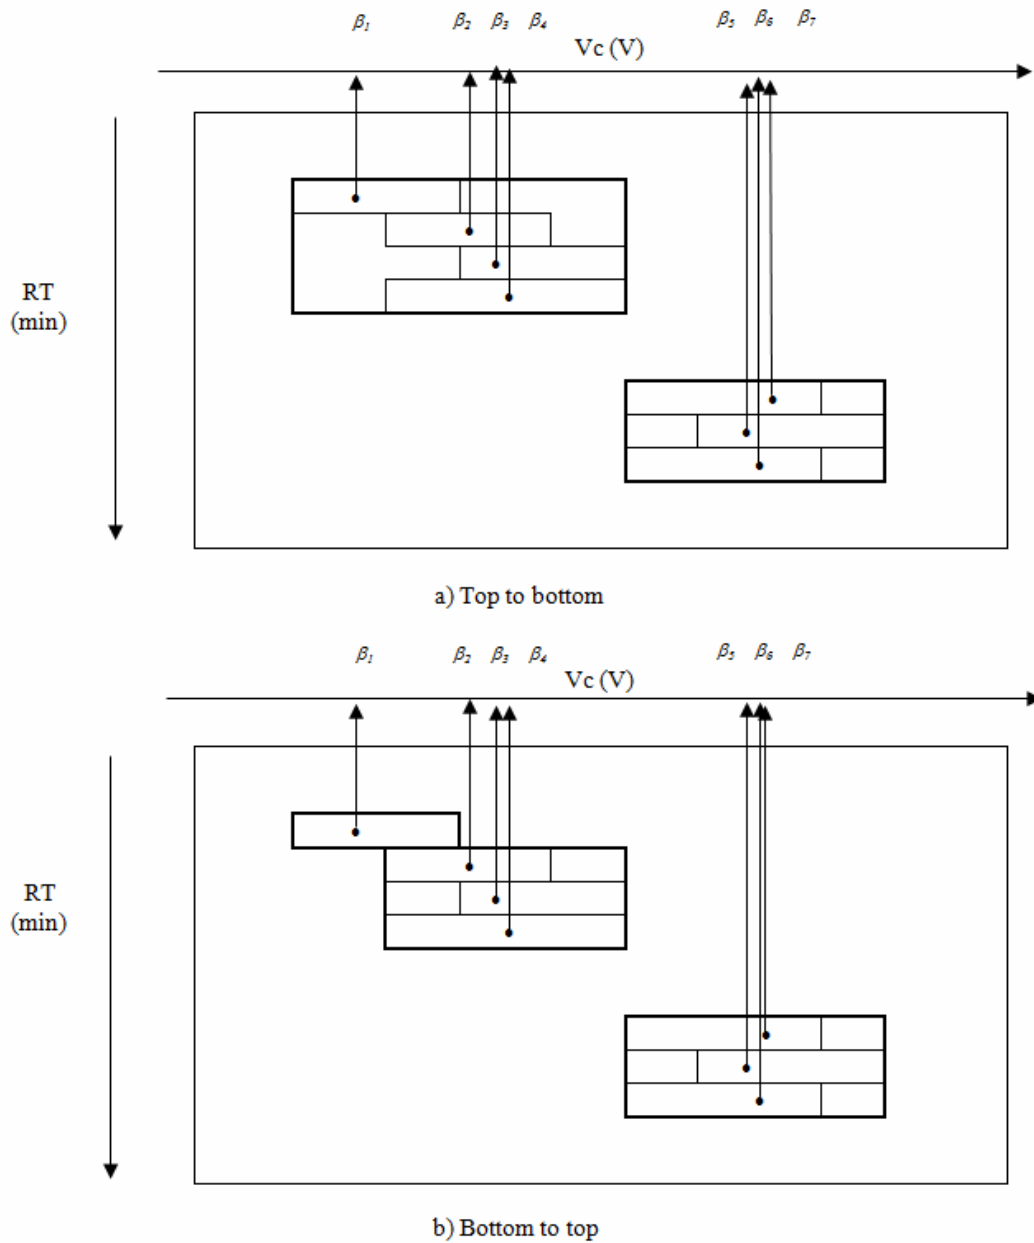

**Figure S-3: Example illustrating the 2D features determined in a sample with the peak detail table examined from a) top to bottom and b) bottom to top direction. The dots refer to the peak maximum and the bolded lines indicate the peak border**
